# Supplementary material
Source: Springer Nature journal article supplement (https://www.springermedizin.de/resource/supplementary/12874_2010_458_MOESM6_ESM.pdf/9432134)

mean lrt

2.0

1.5

1.0

0.5

0

5

10

15

20

25

30

35

40

45

50

55

week

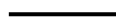

mean lrt for age group < 8 yrs

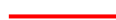

mean lrt for age group 8 yrs or older

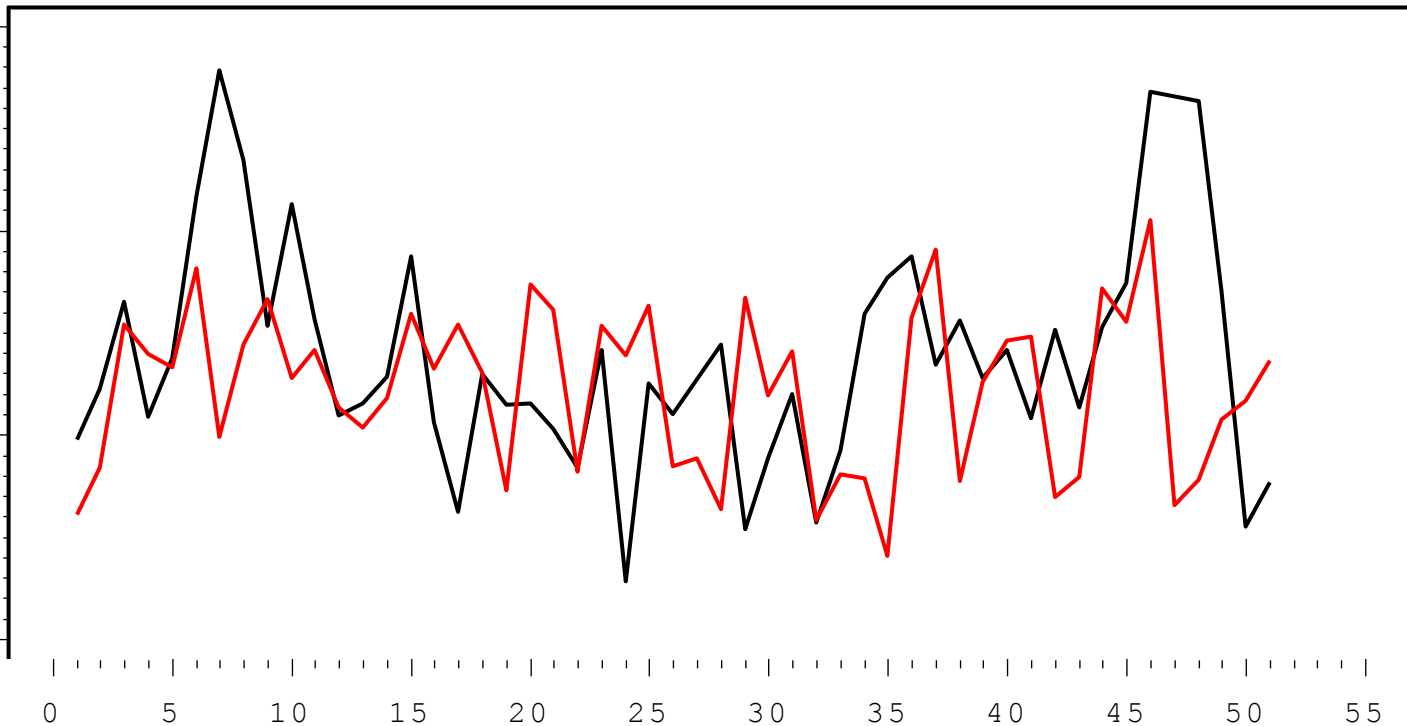

Supplement: MOESM6 [file 9432134]
